# Supplementary material for: The Rm1 and Rm2 Resistance Genes to Green Peach Aphid (Myzus persicae) Encode the Same TNL Proteins in Peach (Prunus persica L.)
Source: MDPI journal article supplement (doi:10.3390/genes13081489), 2022-08-20

Supplemental figures for the article :

Figure S1: FGENESH 2.6 Prediction of potential genes in the *Prunus persica* genomic DNA sequence RM1bac

Figure S2: Mapping of the WFP RNAseq Long-read and the WFP, Rubira, Montclar NGS short-reads onto the Rm1bac sequence at the position of the *TNL1* gene.

Figure S3: TNL1 protein sequence with annotations of the TIR, NBS, NLL, LRR, PL domain motifs. The exon starts are indicated with a triangle

Figure S4: TNL2 protein sequence with annotations of the TIR, NBS, NLL, LRR, PL domain motifs.

Figure S1: FGENESH 2.6 Prediction of potential genes in the *Prunus persica* genomic DNA sequence RM1bac

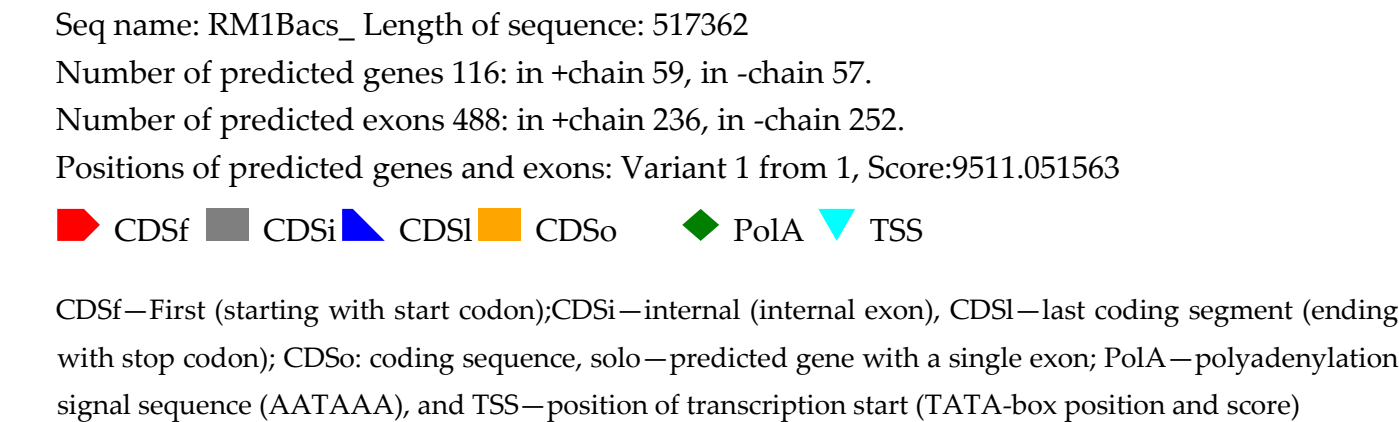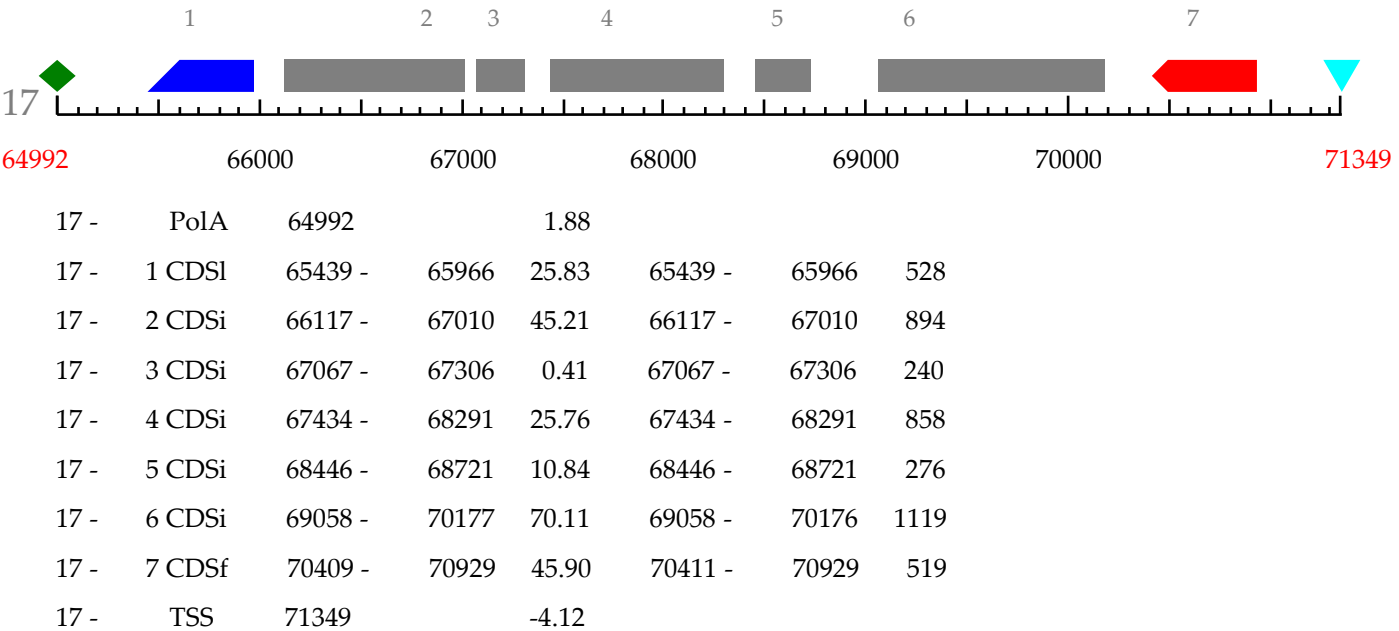

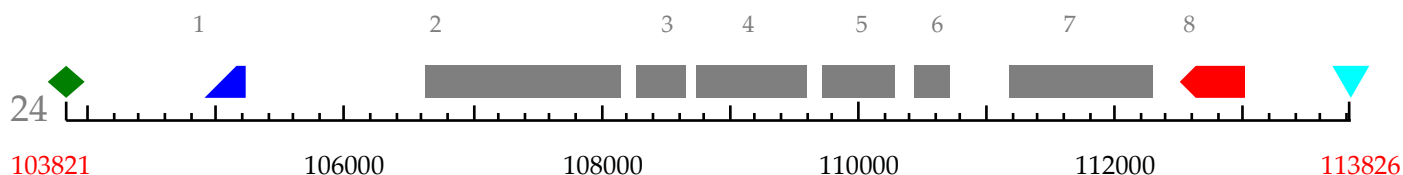

|      |        |          |        |        |          |        |      |
|------|--------|----------|--------|--------|----------|--------|------|
| 24 - | PolA   | 103821   | -2.92  |        |          |        |      |
| 24 - | 1 CDSi | 104898 - | 105219 | 8.27   | 104898 - | 105218 | 321  |
| 24 - | 2 CDSi | 106617 - | 108136 | 160.54 | 106619 - | 108136 | 1518 |
| 24 - | 3 CDSi | 108259 - | 108647 | 15.09  | 108259 - | 108645 | 387  |
| 24 - | 4 CDSi | 108727 - | 109585 | 37.92  | 108728 - | 109585 | 858  |
| 24 - | 5 CDSi | 109710 - | 110273 | 13.36  | 109710 - | 110273 | 564  |
| 24 - | 6 CDSi | 110428 - | 110706 | 16.25  | 110428 - | 110706 | 279  |
| 24 - | 7 CDSi | 111162 - | 112281 | 54.03  | 111162 - | 112280 | 1119 |
| 24 - | 8 CDSf | 112494 - | 113002 | 37.95  | 112496 - | 113002 | 507  |
| 24 - | TSS    | 113826   | -1.32  |        |          |        |      |

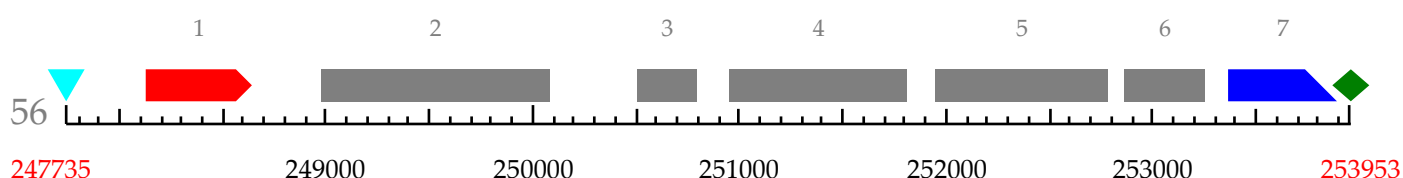

|      |        |          |        |       |          |        |      |
|------|--------|----------|--------|-------|----------|--------|------|
| 56 + | TSS    | 247735   | -3.60  |       |          |        |      |
| 56 + | 1 CDSf | 248120 - | 248634 | 42.28 | 248120 - | 248632 | 513  |
| 56 + | 2 CDSi | 248969 - | 250073 | 70.06 | 248970 - | 250073 | 1104 |
| 56 + | 3 CDSi | 250499 - | 250786 | 10.16 | 250499 - | 250786 | 288  |
| 56 + | 4 CDSi | 250946 - | 251803 | 21.16 | 250946 - | 251803 | 858  |
| 56 + | 5 CDSi | 251942 - | 252776 | 32.57 | 251942 - | 252775 | 834  |
| 56 + | 6 CDSi | 252856 - | 253244 | 14.26 | 252858 - | 253244 | 387  |
| 56 + | 7 CDSi | 253359 - | 253886 | 29.20 | 253359 - | 253886 | 528  |
| 56 + | PolA   | 253953   | -4.22  |       |          |        |      |

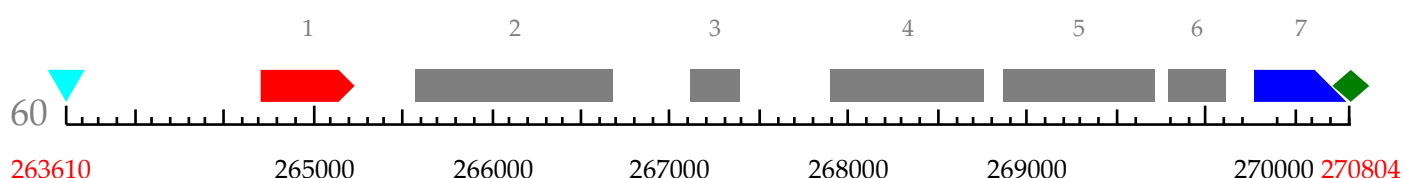

|      |        |          |        |       |          |        |      |
|------|--------|----------|--------|-------|----------|--------|------|
| 60 + | TSS    | 263610   | -2.22  |       |          |        |      |
| 60 + | 1 CDSf | 264699 - | 265225 | 42.87 | 264699 - | 265223 | 525  |
| 60 + | 2 CDSi | 265568 - | 266672 | 57.33 | 265569 - | 266672 | 1104 |
| 60 + | 3 CDSi | 267102 - | 267380 | 7.03  | 267102 - | 267380 | 279  |
| 60 + | 4 CDSi | 267891 - | 268748 | 25.31 | 267891 - | 268748 | 858  |
| 60 + | 5 CDSi | 268856 - | 269702 | 39.95 | 268856 - | 269701 | 846  |
| 60 + | 6 CDSi | 269779 - | 270101 | 15.41 | 269781 - | 270101 | 321  |

60 + 7 CDSI 270262 - 270780 22.99 270262 - 270780 519  
60 + PolA 270804 -4.92

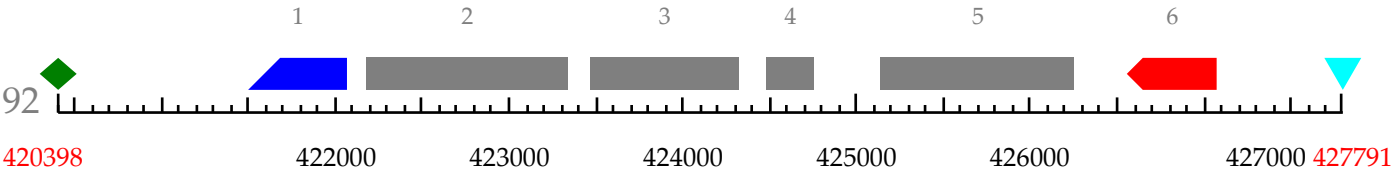

|      |        |          |        |       |          |        |      |
|------|--------|----------|--------|-------|----------|--------|------|
| 92 - | PolA   | 420398   |        | 1.88  |          |        |      |
| 92 - | 1 CDSi | 421491 - | 422060 | 28.06 | 421491 - | 422060 | 570  |
| 92 - | 2 CDSi | 422171 - | 423328 | 56.99 | 422171 - | 423328 | 1158 |
| 92 - | 3 CDSi | 423456 - | 424313 | 31.34 | 423456 - | 424313 | 858  |
| 92 - | 4 CDSi | 424473 - | 424745 | 7.33  | 424473 - | 424745 | 273  |
| 92 - | 5 CDSi | 425131 - | 426244 | 54.70 | 425131 - | 426243 | 1113 |
| 92 - | 6 CDSf | 426548 - | 427065 | 39.62 | 426550 - | 427065 | 516  |
| 92 - | TSS    | 427791   |        | -1.61 |          |        |      |

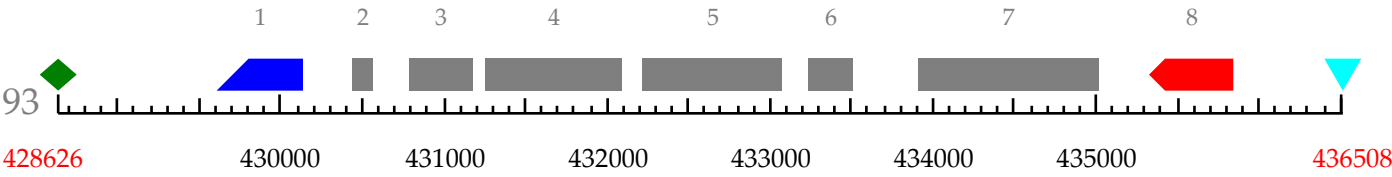

|      |        |          |        |       |          |        |      |
|------|--------|----------|--------|-------|----------|--------|------|
| 93 - | PolA   | 428626   |        | 1.88  |          |        |      |
| 93 - | 1 CDSi | 429598 - | 430128 | 23.77 | 429598 - | 430128 | 531  |
| 93 - | 2 CDSi | 430429 - | 430557 | 0.57  | 430429 - | 430557 | 129  |
| 93 - | 3 CDSi | 430778 - | 431166 | 13.66 | 430778 - | 431164 | 387  |
| 93 - | 4 CDSi | 431246 - | 432086 | 43.70 | 431247 - | 432086 | 840  |
| 93 - | 5 CDSi | 432212 - | 433069 | 26.84 | 432212 - | 433069 | 858  |
| 93 - | 6 CDSi | 433229 - | 433501 | 14.25 | 433229 - | 433501 | 273  |
| 93 - | 7 CDSi | 433900 - | 435010 | 62.88 | 433900 - | 435009 | 1110 |
| 93 - | 8 CDSf | 435319 - | 435836 | 38.51 | 435321 - | 435836 | 516  |
| 93 - | TSS    | 436508   |        | -0.02 |          |        |      |

**Figure S2:** Mapping of the WFP RNAseq Long-read and the WFP, Rubira, Montclar NGS short-reads onto the Rm1bac sequence at the position of the *TNL1* gene.

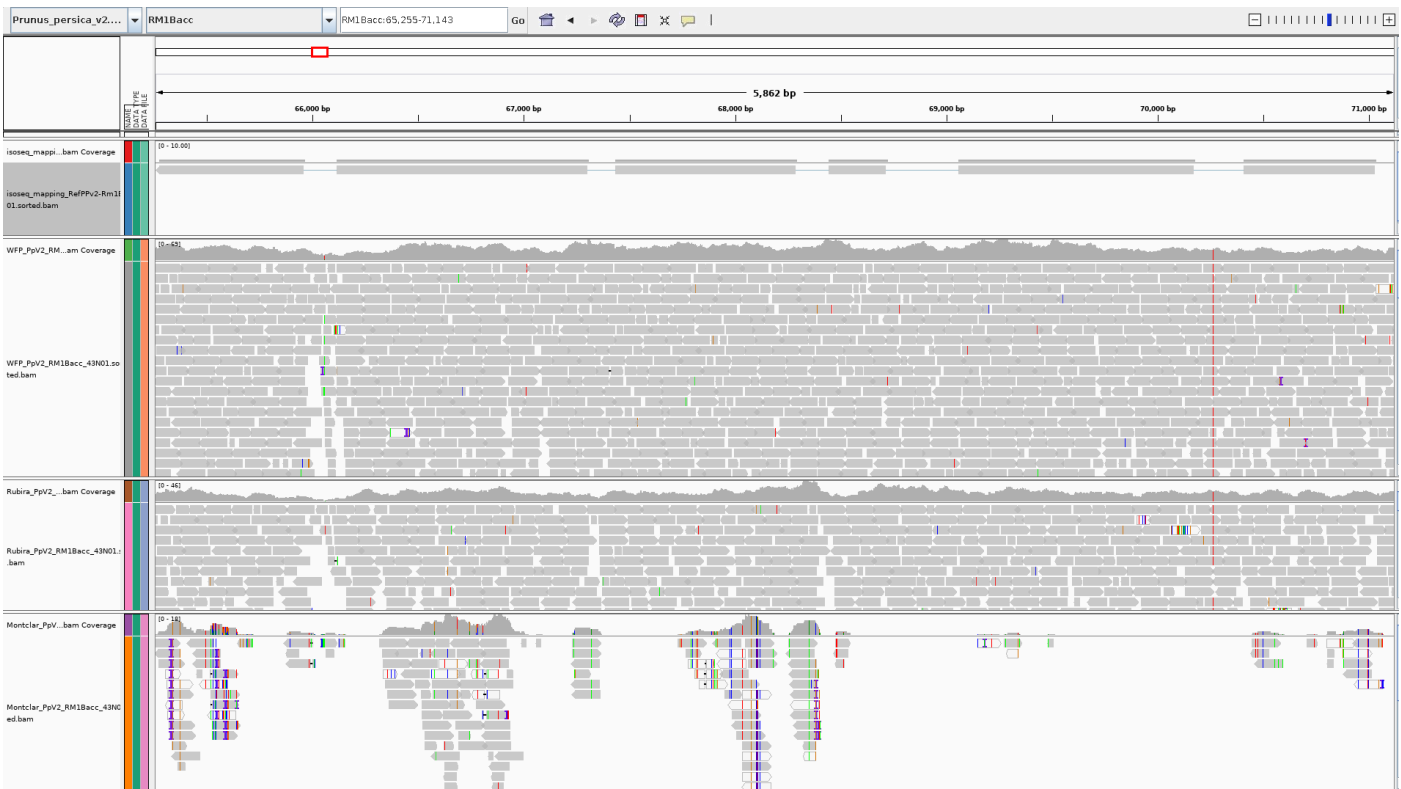

**Figure S3:** TNL1 protein sequence with annotations of the TIR, NBS, NLL, LRR, PL domain motifs. The exon starts are indicated with a triangle.

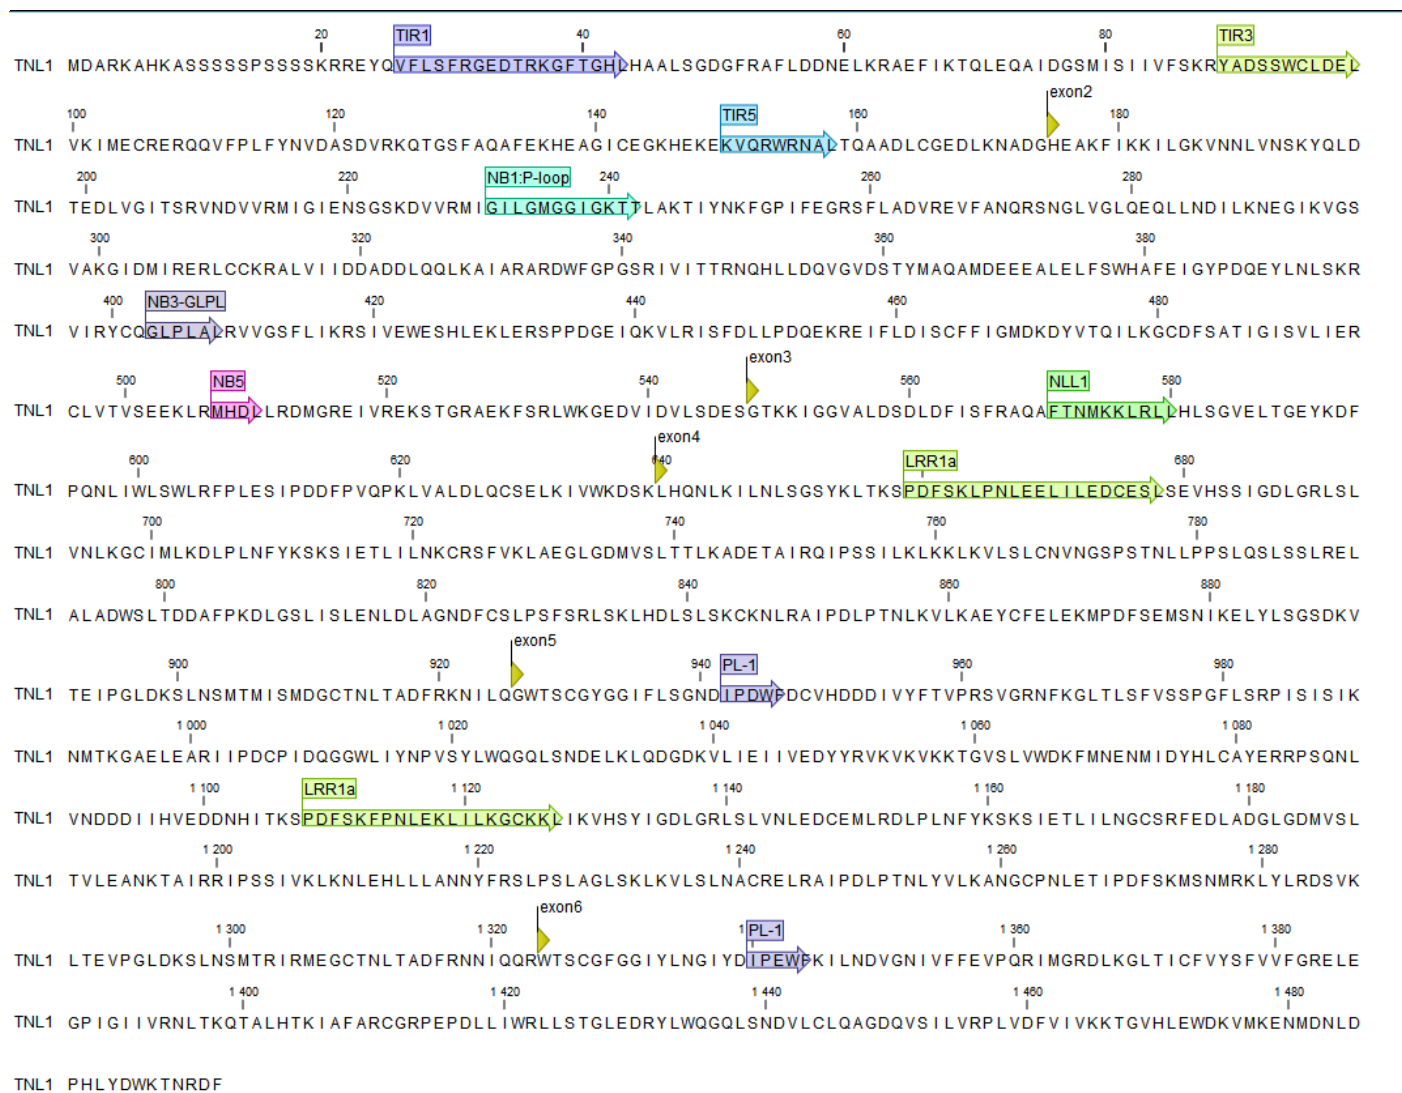

**Figure S4:** TNL2 protein sequence with annotations of the TIR, NBS, NLL, LRR, PL domain motifs.

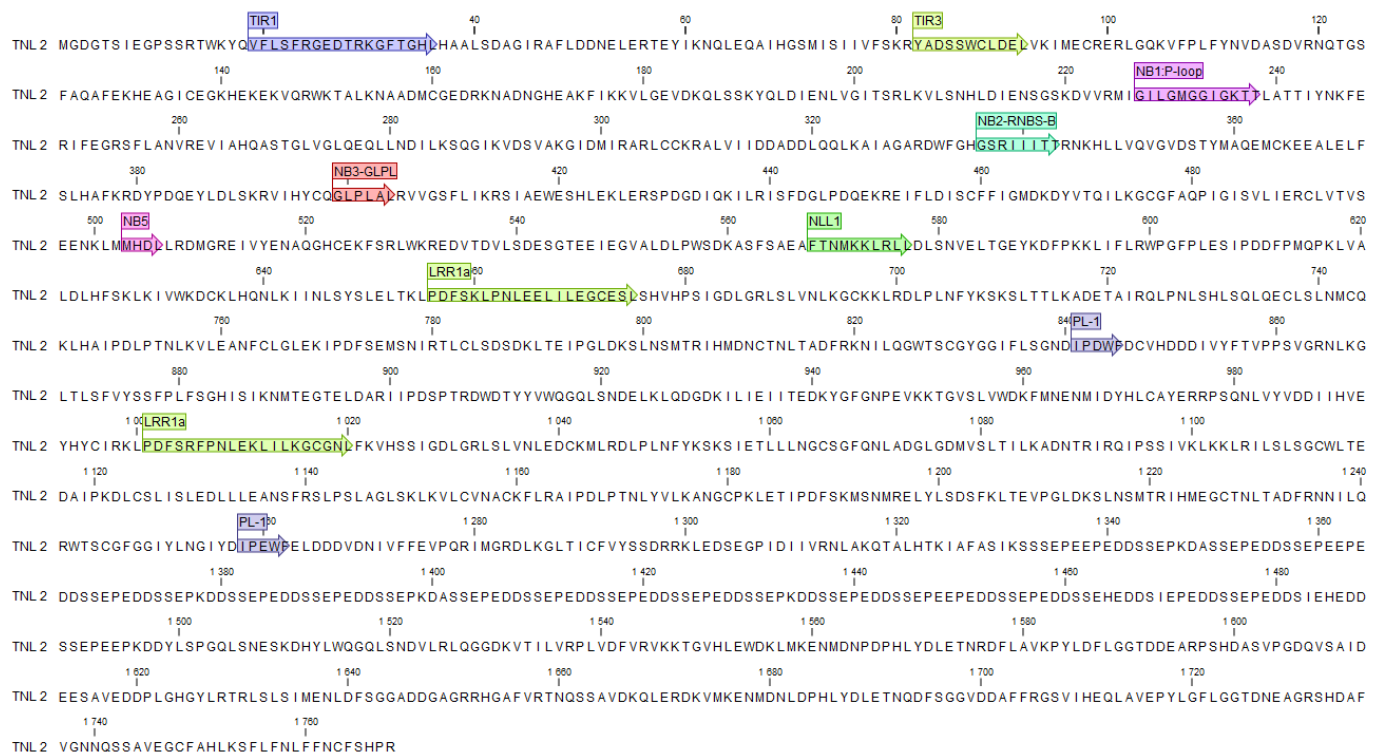

Supplement: s1 [file s1]
